# Supplementary material for: Hedge bindweed, Calystegia sepium (Convolvulaceae), and adventitious host of the chrysanthemum lace bug, Corythucha marmorata (Heteroptera: Tingidae).
Source: Hindawi journal article supplement (doi:10.1155/2017/8596135), 1987-01-01
Supplement: f1 [file 8596135.f1.pdf]

**Tab. S1. Oligos used in the study.**

|                    |                                             |                                        |
|--------------------|---------------------------------------------|----------------------------------------|
| DDX3-F             | CAAGCTTGCGGCCGCGAATTCATGAGTCATGTGGCAGTGGA   | Plasmid for over expression of DDX3    |
| DDX3- R            | TGGCGGCCATCGATTGAATTCTCAGTTACCCACCAGTCAA    |                                        |
| ALKBH5- F          | GTTCCAGATTACGCTGGATCCATGGCGGCCGCGCCAGCGGCTA | Plasmid for over expression of ALKBH5  |
| ALKBH5 -R          | TGGCGGCCATCGATTGAATTCTCAGTGCCGCGCATCTTCA    |                                        |
| FTO- F             | GTTCCAGATTACGCTGGATCCATGAAGCGCACCCCGACTGC   | Plasmid for over expression of FTO     |
| FTO- R             | TGGCGGCCATCGATTGAATTCCTAGGGTTTTGCTTCCAGAA   |                                        |
| METTL3-F           | GTTCCAGATTACGCTGGATCCATGTCCGACACGTGGAGCTC   | Plasmid for over expression of METTL3  |
| METTL3- R          | TGGCGGCCATCGATTGAATTCCTATAAATTCTTAGGTTTAG   |                                        |
| METTL14- F         | GTTCCAGATTACGCTGGATCCATGGATAGCCGCTTGCAGGA   | Plasmid for Over expression of METTL14 |
| METTL14- R         | TGGCGGCCATCGATTGAATTCTTATCGAGGTGGAAAGCCAC   |                                        |
| WTAP- F            | GTTCCAGATTACGCTGGATCCATGGGGCGGCGGTCGCGGGG   | Plasmid for Over expression of WTAP    |
| WTAP- R            | TGGCGGCCATCGATTGAATTCTCACCGGGGTGGATGGACCC   |                                        |
| DDX3 $\Delta$ N-F1 | ATTCCTATTATCAAAGAGAA                        | DDX3 - $\Delta$ N Plasmid Construction |
| DDX3 $\Delta$ N-R1 | GAGCTATGAGAAAGCGCCACGC                      |                                        |
| DDX3 $\Delta$ N-F2 | GCGTGGCGCTTTCTCATAGCTCACGCTGTAGGTATCTCAGTTC |                                        |
| DDX3 $\Delta$ N-R2 | TTCTCTTTGATAATAGGAATCGAATTCGCGGCCGCAAGCTTG  |                                        |

|               |                                               |                                         |
|---------------|-----------------------------------------------|-----------------------------------------|
| DDX3ΔATP-F1   | TTGGCTGTAGGAAGAGTTGGC                         | DDX3 -ΔATP<br>Plasmid<br>Construction   |
| DDX3ΔATP-R1   | GGATCATGTAACCTCGCCTTGATCG                     |                                         |
| DDX3ΔATP-F2   | CGATCAAGGCGAGTTACATGATCCCCATGTTGTGCAAAAAGC    |                                         |
| DDX3ΔATP-R2   | GCCAACTCTTCTACAGCCAAAGCATGCTTTTGCCTGGAGTTGG   |                                         |
| DDX3ΔL-F1     | AACATCACACAGAAAGTAGTTTGG                      | DDX3 -ΔL<br>Plasmid<br>Construction     |
| DDX3ΔL-R1     | GGATCATGTAACCTCGCCTTG                         |                                         |
| DDX3 ΔL-F2    | CAAGGCGAGTTACATGATCCCCATGTTGTGCAAAAAGC        |                                         |
| DDX3ΔL-R2     | CCAAACCTACTTTCTGTGTGATGTTGAAGATATATTCATCTAAGA |                                         |
| DDX3ΔH-F1     | TATGAACACCACTACAAGGGTAG                       | DDX3 -ΔH<br>Plasmid<br>Construction     |
| DDX3ΔH-R1     | CATTTCCGTGTCGCCCTTATTC                        |                                         |
| DDX3-ΔH-F2    | GAATAAGGGCGACACGGAAATGTTGAATACTCATACTCTTCC    |                                         |
| DDX3-ΔH-R2    | CTACCCTTGTAGTGGTGTTCATAGTTTTTCAGAGGTAGAGCCAA  |                                         |
| DDX3ΔC-F1     | TGAGTCGACTCTAGAGGATCC                         | DDX3 -ΔC<br>Plasmid<br>Construction     |
| DDX3ΔC-R1     | GGAAATGTGCGCGGAACCCCT                         |                                         |
| DDX3-ΔC-F2    | AGGGGTTCCGCGCACATTTCCCGAAAAGTGCCACCTGACG      |                                         |
| DDX3-ΔC-R2    | GGATCCTCTAGAGTCGACTCAAGCCATGTTTTCTAACCAAGAC   |                                         |
| DDX3-ATP-F    | CAAGCTTGC GGCCGCGAATTCATTCCTATTATCAAAGAGAA    | DDX3 -ATP<br>Plasmid<br>Construction    |
| DDX3-ATP-R    | TGGCGGCCATCGATTGAATTCCAAGAAGATATATTCATCTA     |                                         |
| ALKBH5-ΔDN-F1 | CCCGAGCGCAGCGACTATGA                          | ALKBH5 -<br>ΔDN Plasmid<br>Construction |
| ALKBH5-ΔDN-R2 | CTCTCAAGGATCTTACCGCT                          |                                         |
| ALKBH5-ΔDN-F2 | AGCGGTAAGATCCTTGAGAGTTTTCGCCCCGAAGAACGTT      |                                         |
| ALKBH5-ΔDN-R2 | TCATAGTCGCTGCGCTCGGGGATCCAGCGTAATCTGGAA       |                                         |

|                 |                                              |                                              |
|-----------------|----------------------------------------------|----------------------------------------------|
| ALKBH5-ΔD1-F1   | GCCGTCATCAACGACTACCAGCC                      | ALKBH5 -ΔD<br>Plasmid<br>Construction        |
| ALKBH5-ΔD-R1    | TTGCGCAACGTTGTTGCCAT                         |                                              |
| ALKBH5-ΔD-F2    | ATGGCAACAACGTTGCGCAAATACTGCGGAACTAC          |                                              |
| ALKBH5-ΔD-R2    | GGCTGGTAGTCGTTGATGACGGCGTCCGAGTCCTCCTGATACT  |                                              |
| ALKBH5-ΔDSBH-F1 | GAAACAAAGTCCCTGAGCAG                         | ALKBH5 -<br>ΔDSBH<br>Plasmid<br>Construction |
| ALKBH5-ΔDSBH-R1 | ACTTTATCCGCCTCCATCCA                         |                                              |
| ALKBH5-ΔDSBH-F2 | TGGATGGAGGCGGATAAAGTTGCAGGACCACTTCTGCGCT     |                                              |
| ALKBH5-ΔDSBH-R2 | CTGCTCAGGGACTTTGTTTCGCTGTTGACGAAGCCCTCGG     |                                              |
| ALKBH5-ΔDC-F1   | TGAGAATTCAATCGATGGCC                         | ALKBH5 -<br>ΔDC Plasmid<br>Construction      |
| ALKBH5-ΔDC-R1   | TCTGCTGAAGCCAGTTACCT                         |                                              |
| ALKBH5-ΔDC-F2   | AGGTAACGGCTTCAGCAGAGCGCAGATACCAAATACTGT      |                                              |
| ALKBH5-ΔDC-R2   | GGCGGCCATCGATTGAATTC TCACCGGGGTGCATCTAATCTTG |                                              |
| ALKBH5-DSBH-F   | GTTCCAGATTACGCTGGATCCGCCGTCATCAACGACTACCAGC  | ALKBH5-<br>DSBH<br>Plasmid<br>Construction   |
| ALKBH5-DSBH-R   | CCATCGATTGAATTCGGATCCTCACAACCGGGGTGCATCTAATC |                                              |
| DDX3-F          | ATGTGGCAGTGGAATGCG                           | For qPCR                                     |
| DDX3-R          | ATATAGCGCCCTTTGCTGGC                         |                                              |
| ALKBH5-F        | CCTGAGCAGCTCCGTGTTAC                         | For qPCR                                     |
| ALKBH5-R        | CCAGGATCCGTGGCCTGTG                          |                                              |
| WTAP-F          | GCTGGCACAGGAGGAATA                           | For qPCR                                     |
| WTAP-R          | CCAGGTCCTTTGCTTGACTG                         |                                              |
| METTL3-F        | CCCACCTCAGTGGATCTGTT                         | For qPCR                                     |

|           |                                                        |                     |
|-----------|--------------------------------------------------------|---------------------|
| METTL3-R  | CCTGTGACCCAGAGGAAGAG                                   |                     |
| FTO-F     | CTGTGAAGGCCCTGAAGAGG                                   | For qPCR            |
| FTO-R     | AAGGGGTATCGCCAAACCAG                                   |                     |
| METTL14-F | TCCTAATTCCTACTTGACTGGTTGT                              | For qPCR            |
| METTL14-R | CCTCCACGGCCCCCTCTA                                     |                     |
| GAPDH-F   | TCGTCCCGTAGACAAAATGGT                                  | For qPCR            |
| GAPDH-R   | CGCCCAATACGGCCAAA                                      |                     |
| siDDX3    | CAAAGGGCGCUAUUCCUCCUCAU<br>AUGAGGAGGAAUUAUAGCGCCCUUUG  | siRNA of<br>DDX3    |
| siALKBH5  | CCCAUCGUGUCCGUGUCCUUCUUUA<br>UAAAGAAGGACACGGACACGAUGGG | siRNA of<br>ALKBH5  |
| scrambled | UUCUCCGAACGUGUCACGUTT<br>ACGUGACACGUUCGGAGAATT         | Negative<br>control |
